# Supplementary material for: Network-State Modulation of Power-Law Frequency-Scaling in Visual Cortical Neurons
Source: PubMed Central journal article supplement (PMC2740863; doi:10.1371/journal.pcbi.1000519), 2009-09-25
Supplement: pcbi.1000519.s004.pdf [file pcbi.1000519.s004.pdf]

|                |      |      |      |
|----------------|------|------|------|
| Layer III cell | HC   | LC   | VLC  |
| r = 0%         | 3.40 | 3.39 | 3.38 |
| r = 1.5%       | 3.56 | 3.62 | 3.63 |
| Layer VI cell  | HC   | LC   | VLC  |
| r = 0%         | 3.39 | 3.36 | 3.29 |
| r = 1.5%       | 3.54 | 3.55 | 3.51 |
